# Supplementary material
Source: HighWire-hosted journal article supplement (https://erj.ersjournals.com/highwire/filestream/131029/field_highwire_adjunct_files/2/ERJ-02049-2015_Appendix_3.pdf)
Supplement: ERJ-02049-2015_Appendix_3.pdf [file ERJ-02049-2015_Appendix_3.pdf]

### Appendix 3. Modified PRISMA diagram

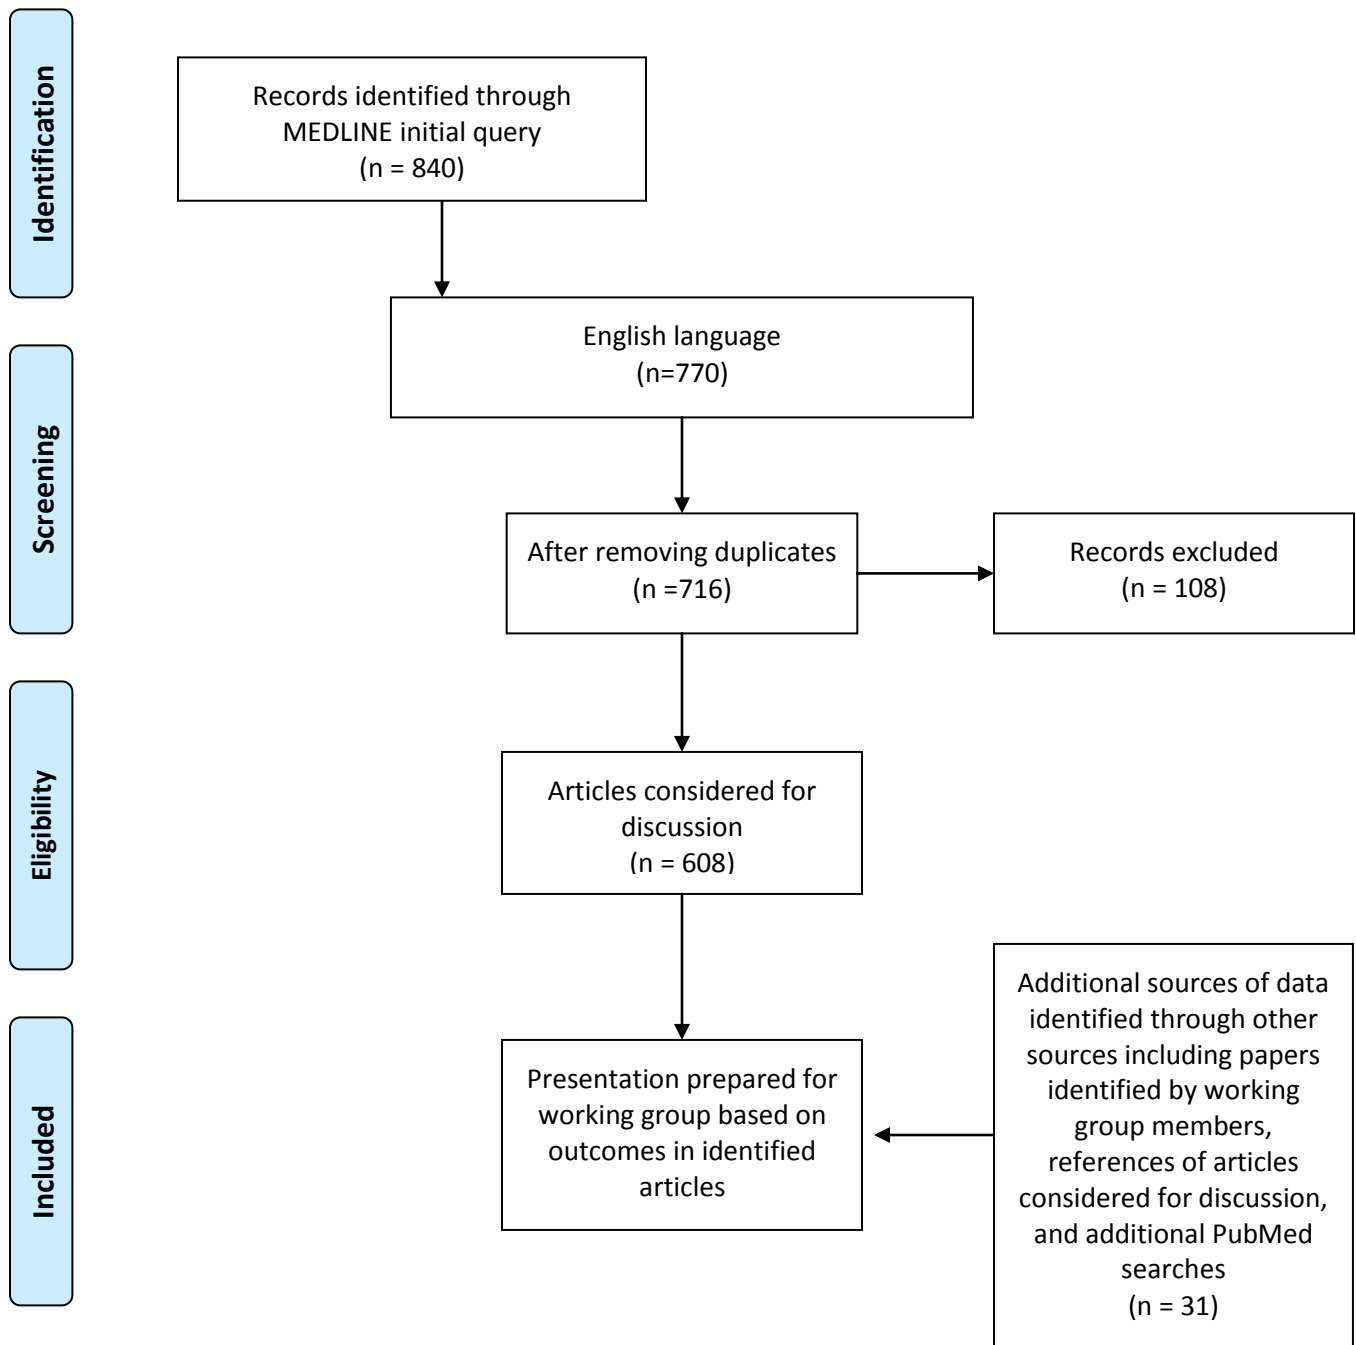

From: Moher D, Liberati A, Tetzlaff J, Altman DG, The PRISMA Group (2009). Preferred Reporting Items for Systematic Reviews and Meta-Analyses: The PRISMA Statement. PLoS Med 6(6): e1000097. doi:10.1371/journal.pmed1000097

For more information, visit [www.prisma-statement.org](http://www.prisma-statement.org).
